# Supplementary material for: Design of 3D printing osteotomy block for foot based on triply periodic minimal surface
Source: Research Square preprint supplement (doi:10.21203/rs.3.rs-3294552/v1), 2023-08-29
Supplement: Supplementary file 1 [file a6a7f957746e19018d9ee3be.docx]

Table1 Mechanical properties of G structure

| Group | Yield strength(MPa) | Extreme strength(MPa) | Elastic modulus(GPa) |
| --- | --- | --- | --- |
| G1.5-20 | 37.78 | 43.26 | 1.70 |
| G2-20 | 29.54 | 38.18 | 1.24 |
| G1.5-30 | 60.11 | 74.19 | 2.56 |
| G2-30 | 51.90 | 68.58 | 2.30 |
